# Supplementary material for: Impaired CXCL12 signaling contributes to resistance of pancreatic cancer subpopulations to T cell-mediated cytotoxicity
Source: PubMed Central journal article supplement — Oncoimmunology. 2022 Feb 3;11(1):2027136. doi: 10.1080/2162402X.2022.2027136 (PMC8816404; doi:10.1080/2162402x.2022.2027136), 2022-02-03
Supplement: KONI_A_2027136_SM6706.pdf [file KONI_A_2027136_SM6706.pdf]

## Supplementary Figure S1

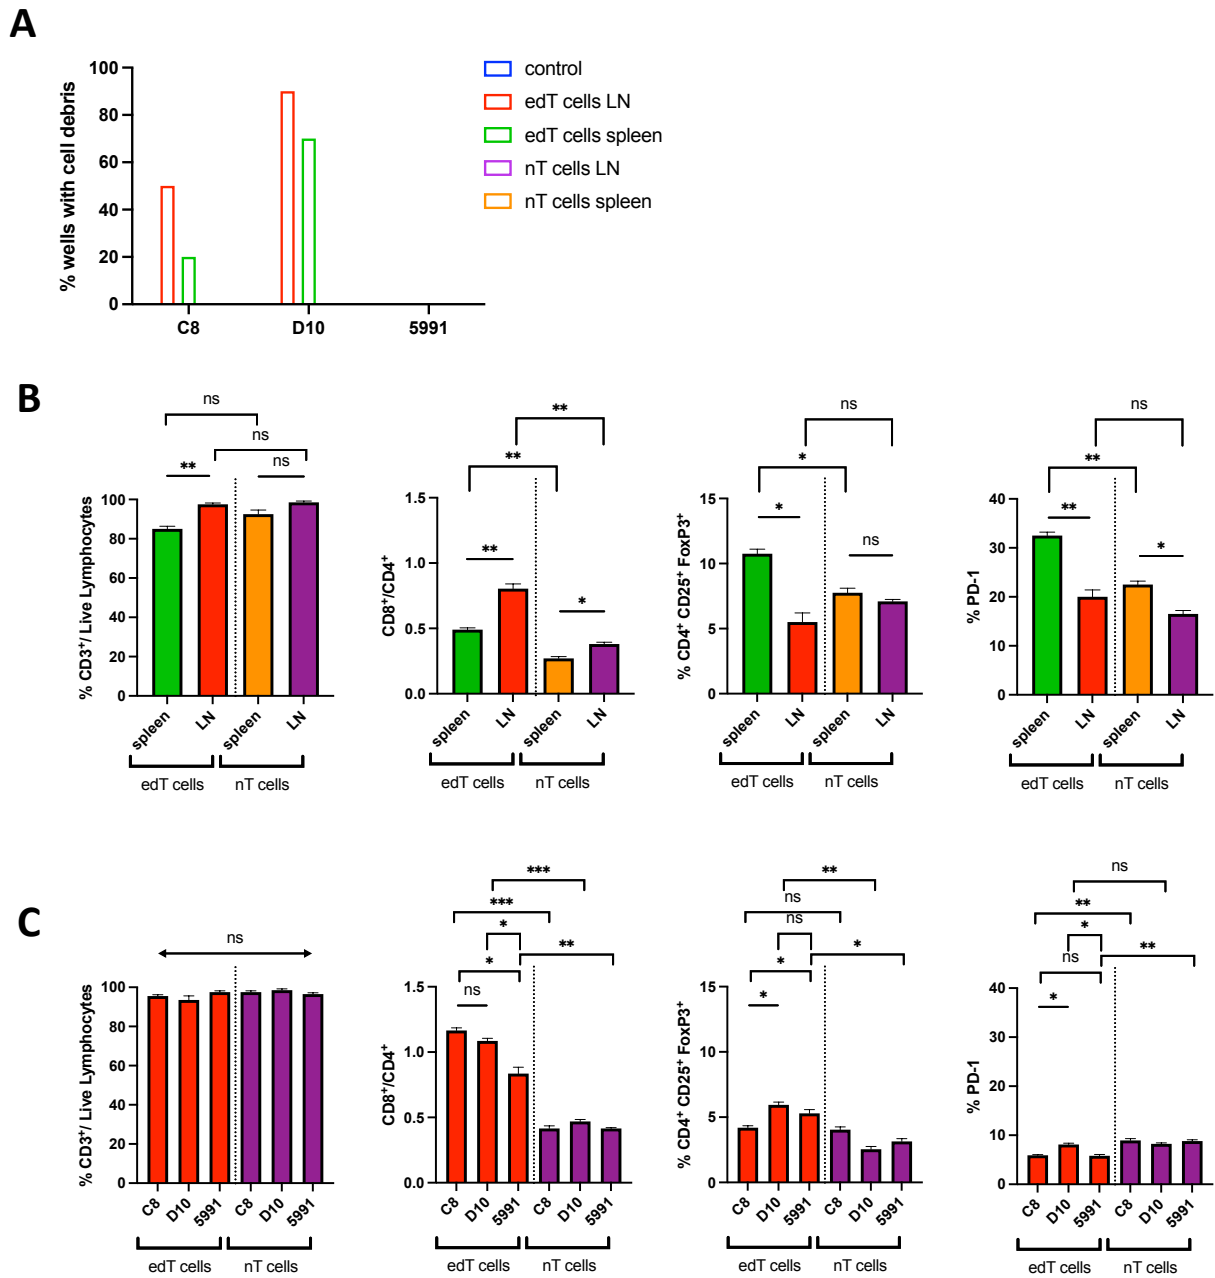

### Supplementary Figure S1

**Cell debris of PDAC cancer cells in co-culture and T cell characterization. (A)** Cell debris in co-cultures. Characterization of T cells before **(B)** and after **(C)** co-culture with cancer spheroids via flow cytometry. edT and nT cells were from lymph nodes. Shown is the percentages of CD3<sup>+</sup>/Live Lymphocytes after isolation, CD4<sup>+</sup>CD25<sup>+</sup>FoxP3<sup>+</sup> cells as regulatory T cells and PD-1<sup>+</sup> T cells. CD8<sup>+</sup>/CD4<sup>+</sup> is given as ratio of positively stained

CD8+ to CD4+ T cells, gated from live CD3+ T cells. (Student t test, \*P < 0.05, \*\*P < 0.01, \*\*\*P < 0.001, n.s., not significant).

# Supplementary Figure S2

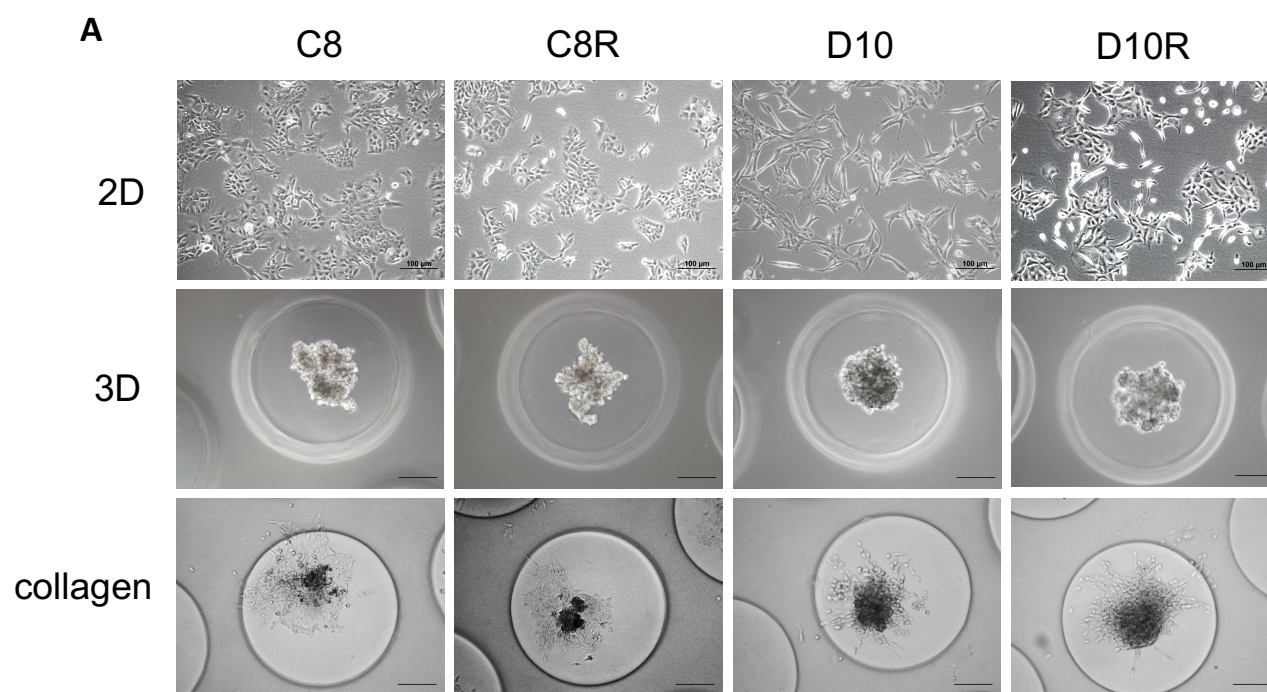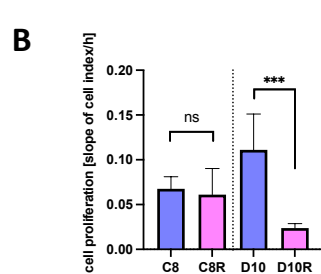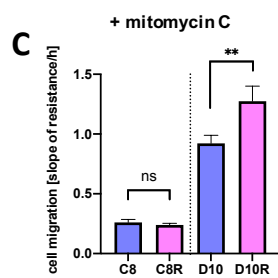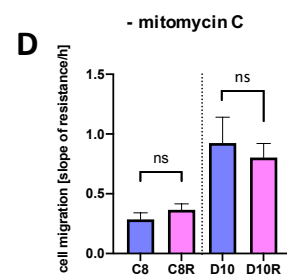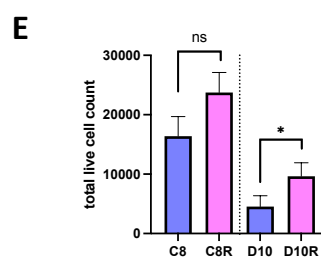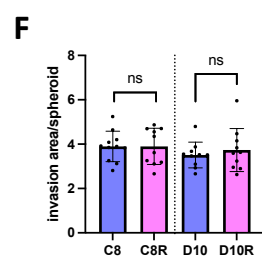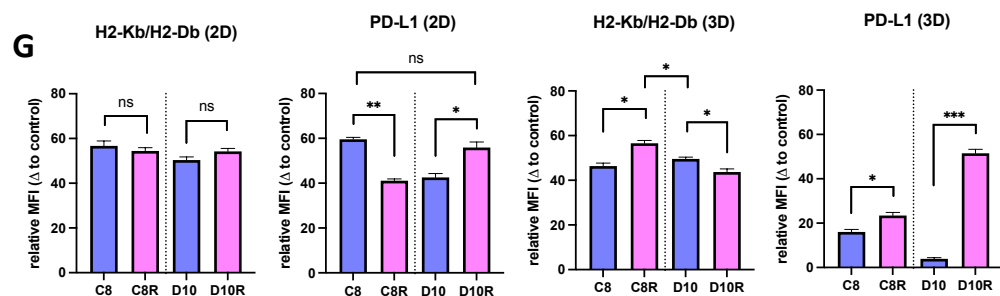

## **Supplementary Figure S2**

### **Parental and resistant cells show distinct phenotypic properties in 2D and 3D culture.**

**(A)** Representative images of paired parental and resistant cells grown in 2D and 3D culture conditions, or embedded in collagen. Scale bars, 100  $\mu\text{m}$ . **(B)** Cancer cell proliferation in 2D is shown as slope of cell index/hours, measured by an Electric cell-substrate impedance sensing (ECIS). The impedance of cells growing on electrodes is measured as a real-time readout. Cancer cell migration in 2D, in the presence **(C)** or absence **(D)** of mitomycin C measured by ECIS in a wound-healing assay. **(E)** 3D cancer cell growth after 3 days of spheroid culture in agarose casts, is shown as total live cell counts measured via flow cytometry. **(F)** 3D cancer cell invasion into collagen is shown as relative invasion area/spheroid. **(G)** Cell surface expression of MHC-1 (H2-Kb/H2-Db) and PD-L1 of cancer cells in 2D and 3D was analyzed via flow cytometry and shown as median fluorescence intensity (MFI) relative to unstained control. All data represent the means  $\pm$  SD from at least three biological replicates and three technical replicates. (Student t test, \*P < 0.05, \*\*P < 0.01, \*\*\*P < 0.001, n.s., not significant).

## Supplementary Figure S3

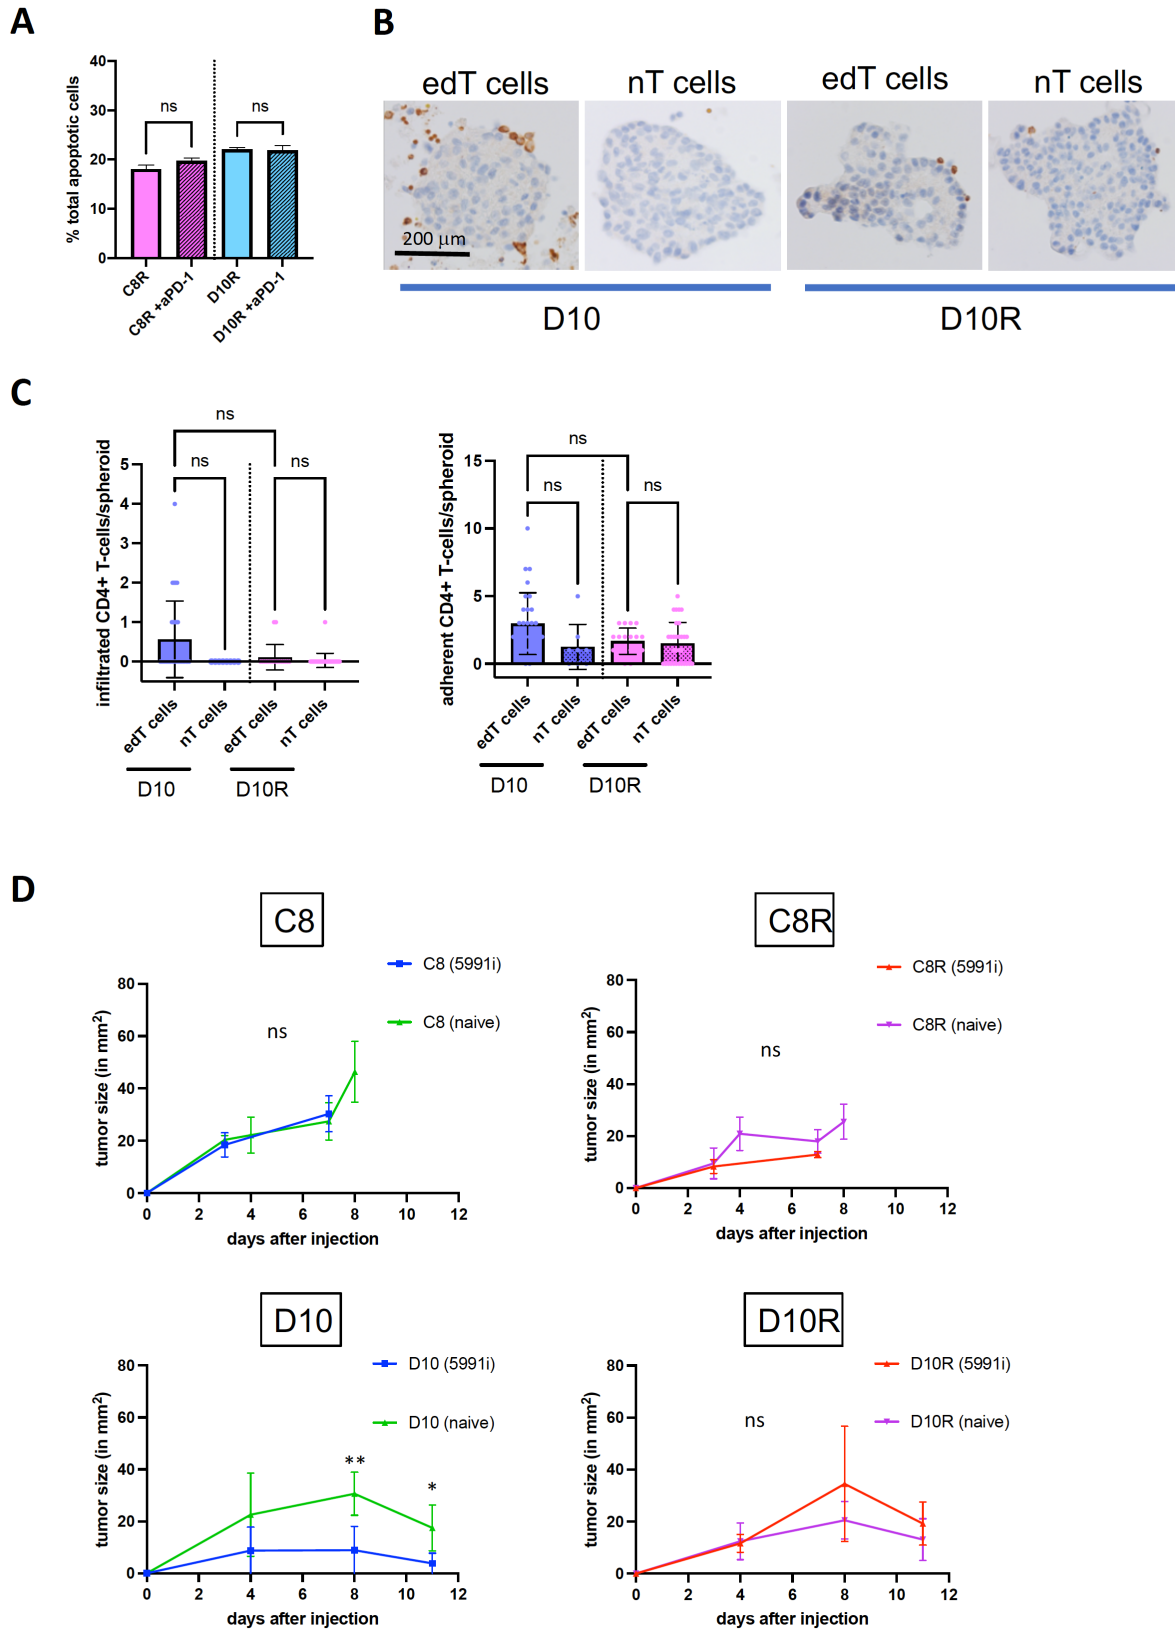

### **Supplementary Figure S3**

**Anti-PD-1 effect and localization of CD4<sup>+</sup> T cells in cancer spheroids.** **(A)** Percentage of total apoptotic resistant cancer cells  $\pm$  anti-PD-1 after co-culture with edT cells. **(B)** Representative 3D co-culture sections of D10/D10R stained by immunohistochemistry for CD4<sup>+</sup>. Scale bar, 200  $\mu$ m. **(C)** Quantification of infiltrated and adherent CD4<sup>+</sup> T cells in cancer spheroid co-culture. **(D)** Growth rate of parental and resistant allograft tumors  $\pm$  pre-immunization with KPC 5991 cells. Naïve groups are allograft tumors from mice without KPC 5991-immunization. Shown are the tumor growth curves of the individual tumors for each group. Error bars are SEM for  $n \geq 3$  tumors. 5991i= 5991 cells – pre-immunized tumors. (Student t test and One-way ANOVA multiple comparison, \*P < 0.05, \*\*P < 0.01, n.s., not significant).

Supplementary Figure S4

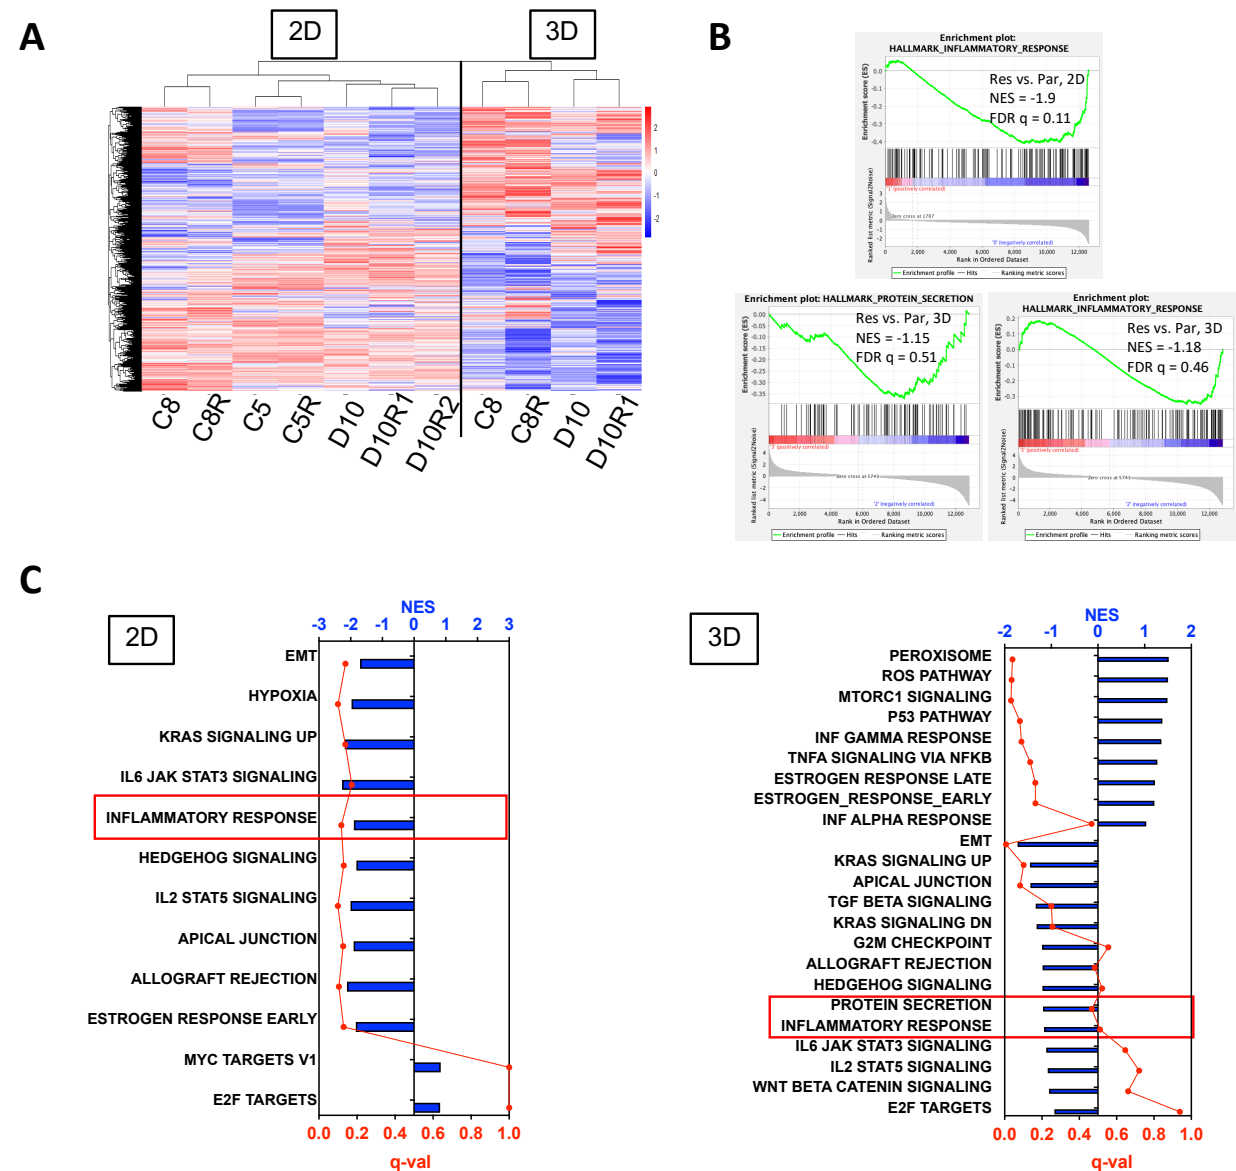

Supplementary Figure S4

**Differential gene expression in resistant vs. parental cells.** (A) Heatmap of gene expression from paired parental/resistant PDAC cell lines in 2D and 3D based on an RNA-sequencing analysis. C5R has been isolated from the PDAC clonal cancer cell line C5 in a separate co-culture experiment. C5/C5R were included in the transcriptomic analysis. D10R1 and D10R2 are two different resistant cell lines derived from D10 from two independent co-culture experiments. (B) Gene set enrichment analysis (GSEA) hallmark

pathways of resistant vs. parental cells. **(C)** Overview of GSEA hallmark pathways for resistant vs. parental cells in 2D and 3D. Normalized GSEA enrichment score and FDR q-value are shown as indicated. Highlighted are differentially regulated hallmark pathways for *Inflammatory Response* and *Protein Secretion* between resistant vs. parental cells.

## Supplementary Figure S5

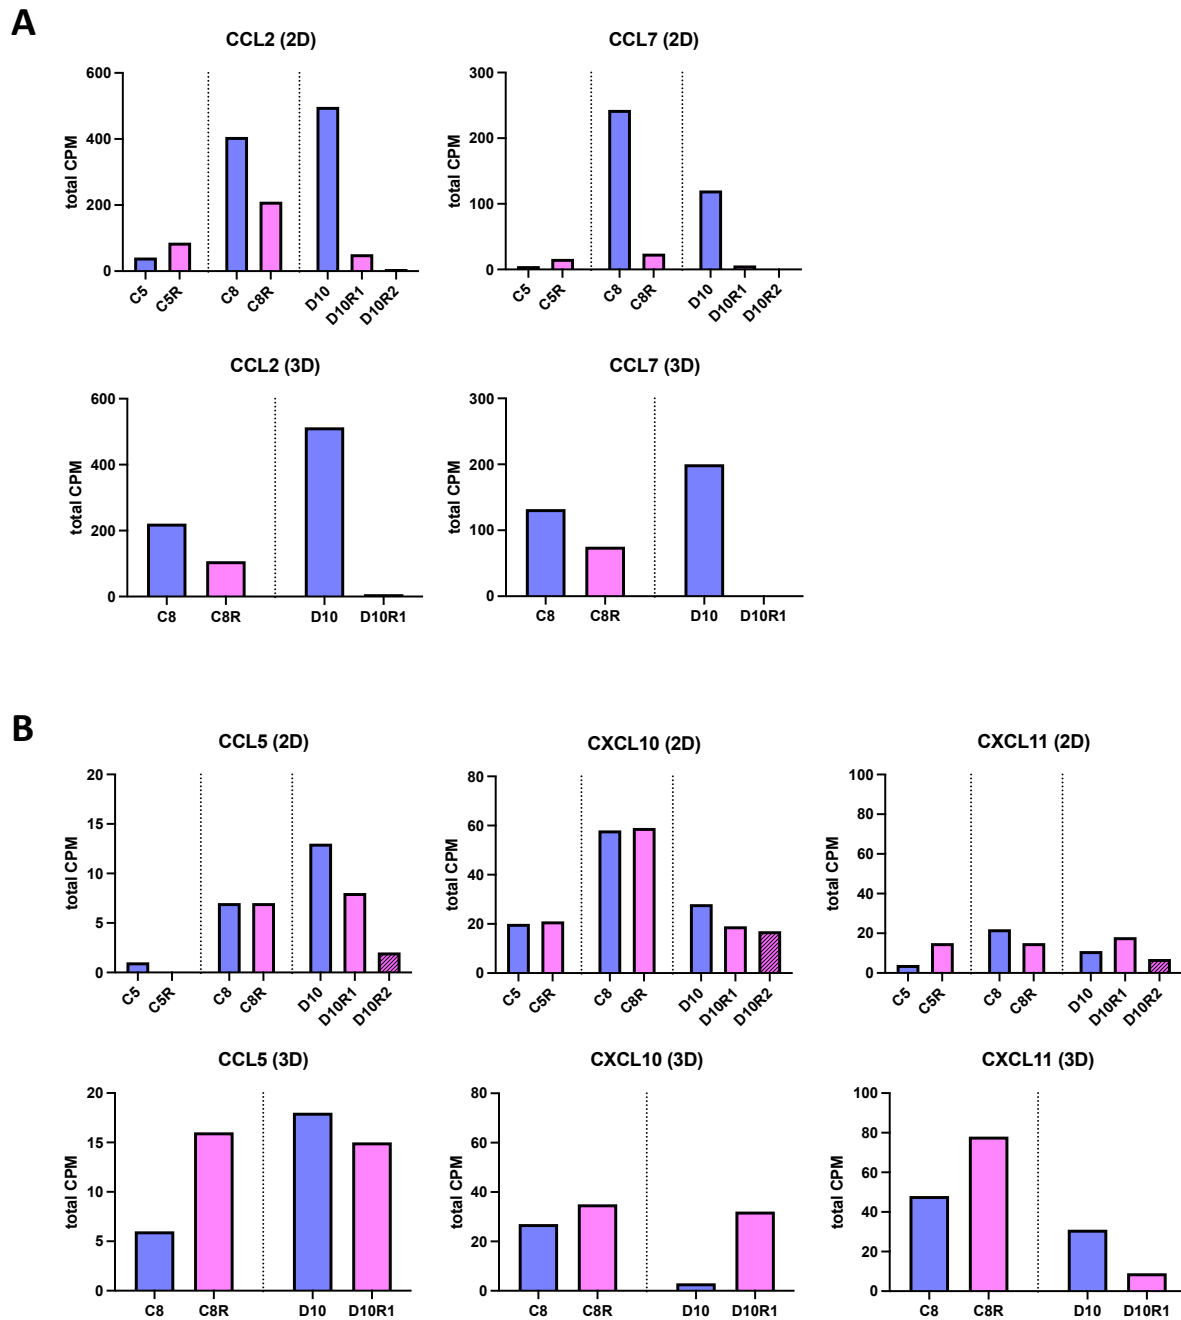

## Supplementary Figure S5

**T cell recruiting chemokine expression in parental and resistant cancer cells. (A)** Gene expression level of T cell chemoattractant chemokines and **(B)** Th1-type chemokines in paired parental/resistant cell lines in 2D and 3D. Expression data are based

on an RNA-sequencing analysis. C5R has been isolated from the PDAC clonal cancer cell line C5 in a separate co-culture experiment. C5/C5R were included in the transcriptomic analysis. D10R1 and D10R2 are two different resistant cell lines derived from D10 from two independent co-culture experiments. D10R1 is also referred to as D10R in 3D co-culture experiments. CPM= transcripts per million.

Supplementary Figure S6

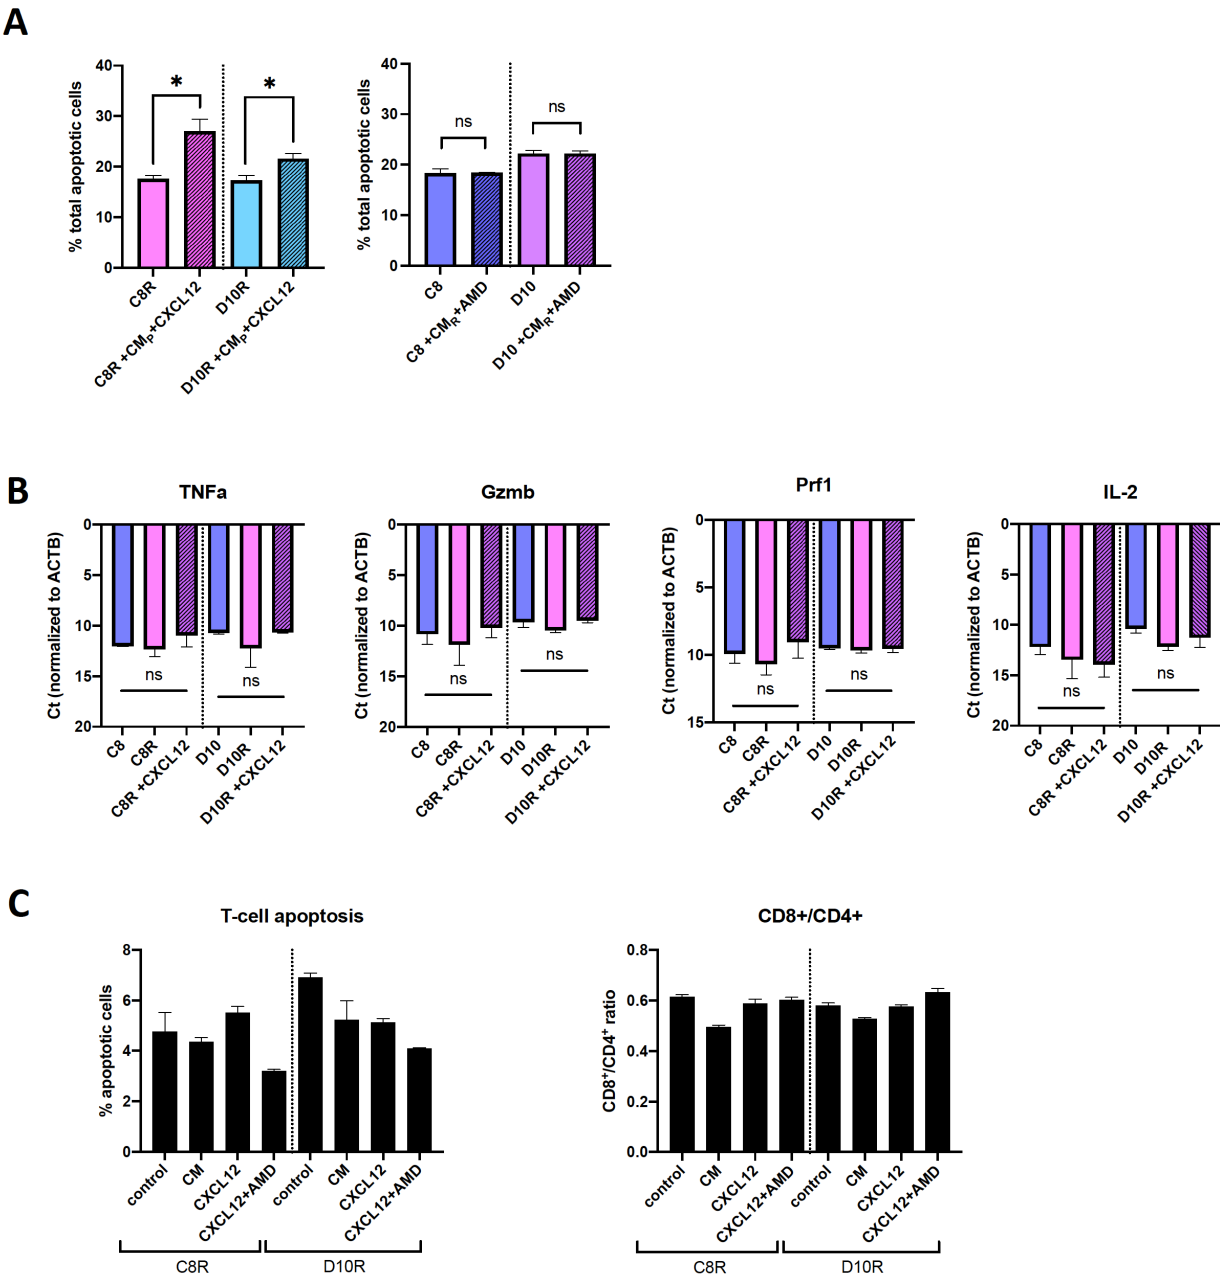

### **Supplementary Figure S6**

**Conditioned media- and CXCL12-effect on edT cell killing of PDAC cells. (A)** Percentage of total apoptotic resistant cancer cells +CM<sub>P</sub> or +CXCL12 after co-culture with edT cells. Controls are cancer spheroid co-culture with edT cells without drug treatment. **(B)** Expression of T cell activation markers by RT-qPCR. Shown are mRNA transcript levels in cancer spheroid with T cells co-culture as Ct-values normalized to beta-actin. **(C)** Total percentage of apoptotic edT cell after 4 days of edT cell co-culture with resistant cell lines +/- drug treatment as indicated. CD8<sup>+</sup>/CD4<sup>+</sup> ratio of edT cells after co-culture. All data represent the means  $\pm$  SD from at least three biological replicates and two technical replicates. (Student t test, \*P < 0.05, n.s., not significant). CM<sub>R</sub>= conditioned media of resistant cells; CM<sub>P</sub> or CM= conditioned media of parental cells.

## Supplementary Figure S7

**A**

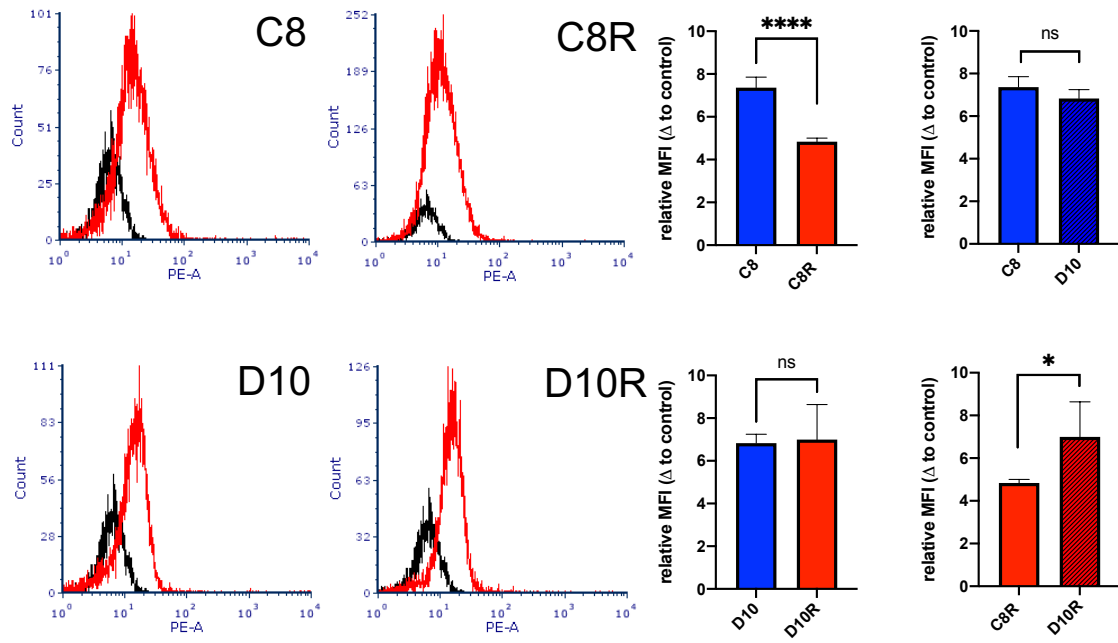

**B**

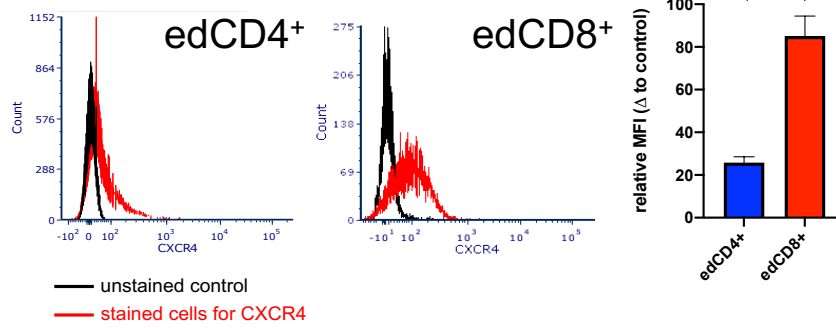

**C**

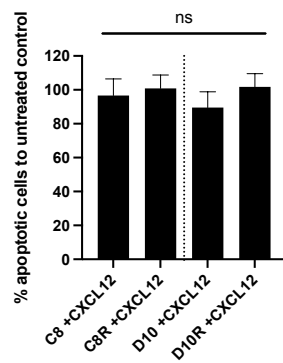

### **Supplementary Figure S7**

**Cell surface expression of CXCR4 on cancer cells and edT cells.** **(A)** Representative histograms of paired parental/resistant cancer cells, and **(B)** PDAC tumor-educated (ed) CD4<sup>+</sup> and CD8<sup>+</sup> T cells, measured for CXCR4 expression via flow cytometry. Shown is also the quantification of CXCR4 expression level as delta median fluorescence intensity (MFI) to unstained control. **(C)** Percentage of CXCL12-treated total apoptotic cancer cells to control (untreated) after 3 days of culture in agarose molds. All data represent the means  $\pm$  SD from at least three biological replicates and two technical replicates. (Student t test, \*P < 0.05, \*\*\*P < 0.001, \*\*\*\*P < 0.0001, n.s., not significant).

## Supplementary Figure S8

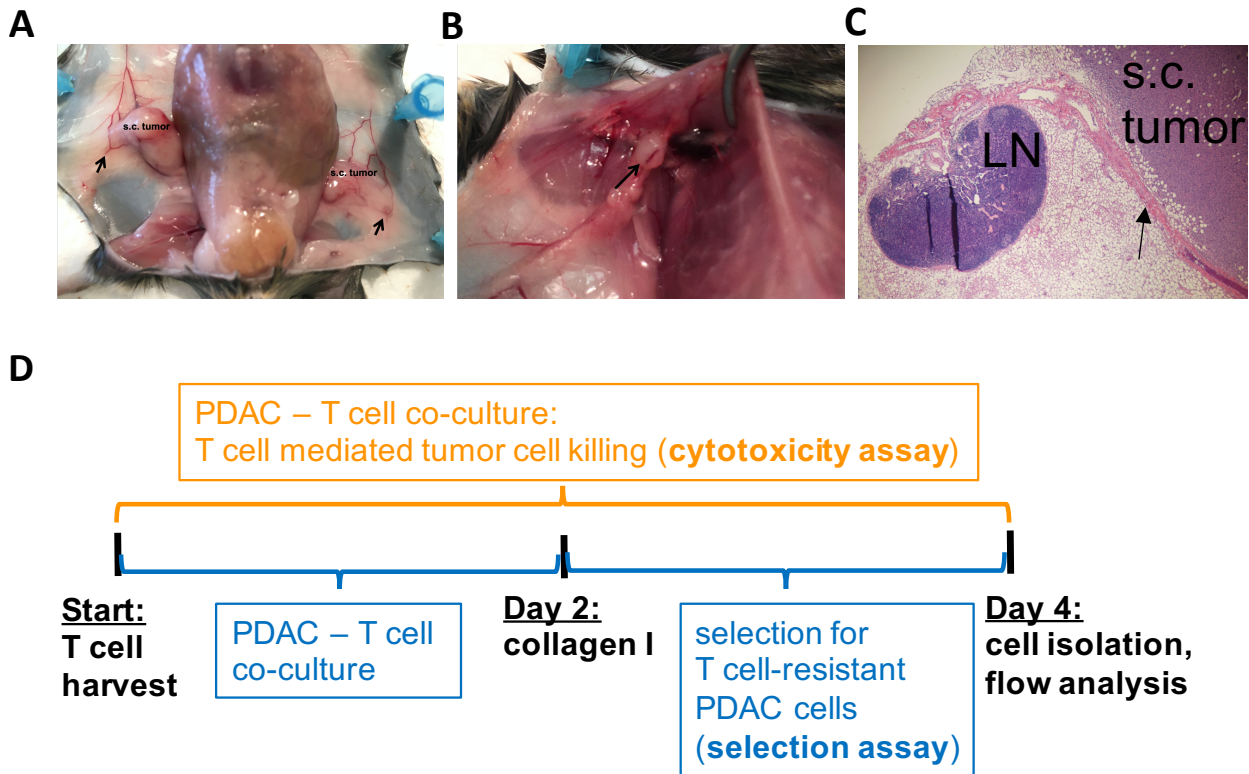

### Supplementary Figure S8

**Anatomical location of tumor-draining lymph nodes and timeline of co-culture studies.** (A-C) Anatomical exposures of bilateral inguinal (A) and right lateral axillary (B) draining lymph nodes of a PDAC tumor-immunized mouse. Arrows point to the lymph node. (C) Tumor section including adjacent inguinal lymph node, stained with hematoxylin and eosin. Arrow points to a vessel connecting lymph node with the tumor. LN= lymph node, s.c.= subcutaneous. (D) Shown is the timeline of the 3D co-culture experiments.

## Supplementary Figure S9

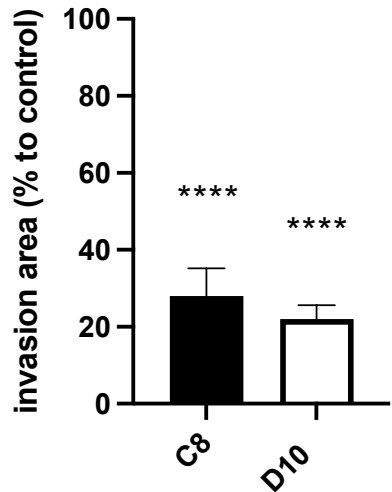

### Supplementary Figure S9

**Effect of splenic edT cells from KPC mice with spontaneous PDAC on cancer cells *in vitro*.** Invasion area of PDAC cell spheroids in 3D co-culture with splenic edT cells shown as percentage to control. Control is cancer spheroid only. At least 20 cancer spheroids were analyzed per group. Data represent the means  $\pm$  SD from three biological replicates. (Student t test, \*\*\*\*P < 0.0001).

## Supplementary Table S1

| Gene      | Primer                  |
|-----------|-------------------------|
| mIFNg_Fwd | GCCACGGCACAGTCATTGAA    |
| mIFNg_Rev | GTCACCATCCTTTTGCCAGTTCC |
| mGzmb_Fwd | CCACTCTCGACCCTACATGG    |
| mGzmb_Rev | GGCCCCCAAAGTGACATTTATT  |
| mTNFa_Fwd | ACAAGCCTGTAGCCCACGTC    |
| mTNFa_Rev | GTGAGGAGCACGTAGTCGGG    |
| mPrf1_Fwd | AGCACAAGTTCGTGCCAGG     |
| mPrf1_Rev | GCGTCTCTCATTAGGGAGTTTTT |
| mIl-2_Fwd | ATGAACTTGGACCTCTGCGG    |
| mIl-2_Rev | GTCCACCACAGTTGCTGACT    |
| mActb_Fwd | GTGACGTTGACATCCGTAAAGA  |
| mActb_Rev | GCCGGACTCATCGTACTCC     |

### Supplementary Table S1

Primer sequences of murine T cell activation markers.

## Supplementary Table S2

### T cell abundance markers (CD4, CD8):

|               | - fold cancer / normal | p-value                |
|---------------|------------------------|------------------------|
| Breast:       | 1.31                   | $2.47 \times 10^{-31}$ |
| Kidney (RCC): | 5.45                   | $6.14 \times 10^{-45}$ |
| Melanoma:     | 2.18                   | $1.44 \times 10^{-72}$ |
| PDAC:         | 6.36                   | $4.37 \times 10^{-54}$ |

### T cell exhausting markers [ LAG3, PD1 (PDCD1), TIM3 (HAVCR2) ]

|               | - fold cancer / normal | p-value                |
|---------------|------------------------|------------------------|
| Breast:       | 1.93                   | $5.84 \times 10^{-55}$ |
| Kidney (RCC): | 4.18                   | $1.47 \times 10^{-27}$ |
| Melanoma:     | 2.77                   | $2.67 \times 10^{-83}$ |
| PDAC:         | 8.74                   | $9.57 \times 10^{-58}$ |

**Supplementary Table S2.** Relative expression of T cell abundance markers (CD4 and CD8) and T cell exhausting markers LAG3, PD1 (PDCD1), TIM3 (HAVCR2) comparing paired cancer and normal tissues. Gene expression is from RNAseq of cancer and normal tissues. Data from the TNMplot data base ( <https://tnmplot.com/analysis/> ) <sup>1</sup>. RCC = Renal clear cell carcinoma.

1. Bartha Á, Györfy B. TNMplot.com: A Web Tool for the Comparison of Gene Expression in Normal, Tumor and Metastatic Tissues. Int J Mol Sci. 2021;22(5):2622. PMID: 33807717
